# Supplementary material for: Immediate smoking cessation support versus usual care in smokers attending a targeted lung health check: the QuLIT trial
Source: PubMed Central journal article supplement — BMJ Open Respir Res. 2022 Feb 4;9(1):e001030. doi: 10.1136/bmjresp-2021-001030 (PMC8819808; doi:10.1136/bmjresp-2021-001030), 2022-02-04
Supplement: bmjresp-2021-001030supp001.pdf [file bmjresp-2021-001030supp001.pdf]

**Smoking Follow up Proforma**

Patient ID \_\_\_\_\_ Smoker at time of lung health screening?

Today's date \_\_\_\_\_

Hello, my name is xxxxxxxx. I'm calling from the lung health screening program. "When we saw you in (month), you were still smoking and we are following people up to find out what's happened."

**(1) Are you still smoking?** (circle) Yes /No

(if Yes go to 5)

**IF NO LONGER SMOKING**"That's great news. When did you last have a cigarette?" **(2a) Date:** stopped on \_\_\_\_\_If unsure ask. "Can you say how many days since you last had a cigarette." **(2b)** \_\_\_\_\_**(3) "I'm going to ask you what help you used to quit?"**

Nicotine replacement (circle) \_\_\_\_\_ gum patches spray inhalator and lozenges

Counselling support \_\_\_\_\_ Yes / No

Tablets (Varenicline/Champix or bupropion/zyban) \_\_\_\_\_ Yes / No

If yes, which? \_\_\_\_\_

Just tried to quit by myself \_\_\_\_\_ Yes / No.

**(4) What was the main reason you decided to quit – circle all mentioned, underline the main one?**

Health \_\_\_\_\_ Money \_\_\_\_\_ Other (specify): \_\_\_\_\_

**5) How many times had you attempted to quit smoking prior to participating in the Health Lung Project?**

a) 1-3 times

b) Numerous attempts

c) Other: \_\_\_\_\_

**6) How significant do you think the support you received from the smoking cessation advisor contribute towards your ability to stop smoking?**

- a) Very significant:
- b) Not valuable at all:
- c) I don't know:

**7) How much would you recommend these service to your friends, family members, work colleagues who are still struggling in their attempts to stop smoking**

- a) Highly recommend
- b) Not recommend at all
- c) I don't know:

**IF STILL SMOKING****(1) Did you try to quit smoking?**

Yes/no:

**(2) "I'm going to ask you what help you used to try to quit?"**

Nicotine replacement (circle) gum patches spray inhalator

Counselling support Yes / No

Tablets (Varenicline/Champix or bupropion/zyban) Yes / No If yes,  
which? \_\_\_\_\_

Just tried to quit by myself Yes / No:

**(3) What was the main reason you decided to quit – circle all mentioned, underline the main one?**

Health: Money Other (specify) \_\_\_\_\_

**(4) I note that when you attended the HLP, you declined support to quit smoking. Since receiving your HLP results until now, have you changed your views about stopping to smoke?**

a) Yes

b) No:

**(5) Would you like to be supported to quit?**

a) Yes:

b) No:

c) Undecided

Stopping smoking is the most important thing that you can do to improve your health now and reduce the risk of health problems in the future. Have you had a look at the NHS smokefree website? <https://www.nhs.uk/smokefree> Yes / No

Many thanks.
